# Supplementary material for: Ultra-fast spin-mixing in a diketopyrrolopyrrole monomer/fullerene blend charge transfer state
Source: Royal Society of Chemistry journal article supplement (doi:10.1039/c7ta07381j), 2017-01-01
Supplement: c7ta07381j1.pdf [file c7ta07381j1.pdf]

## Supporting Information

### Ultra-fast spin-mixing in a diketopyrrolopyrrole monomer / fullerene blend charge transfer state

Enrico Salvadori,<sup>‡</sup> Nathaniel Luke,<sup>‡</sup> Jordan Shaikh, Anastasia Leventis, Hugo Bronstein, Christopher W.M. Kay, and Tracey M. Clarke\*

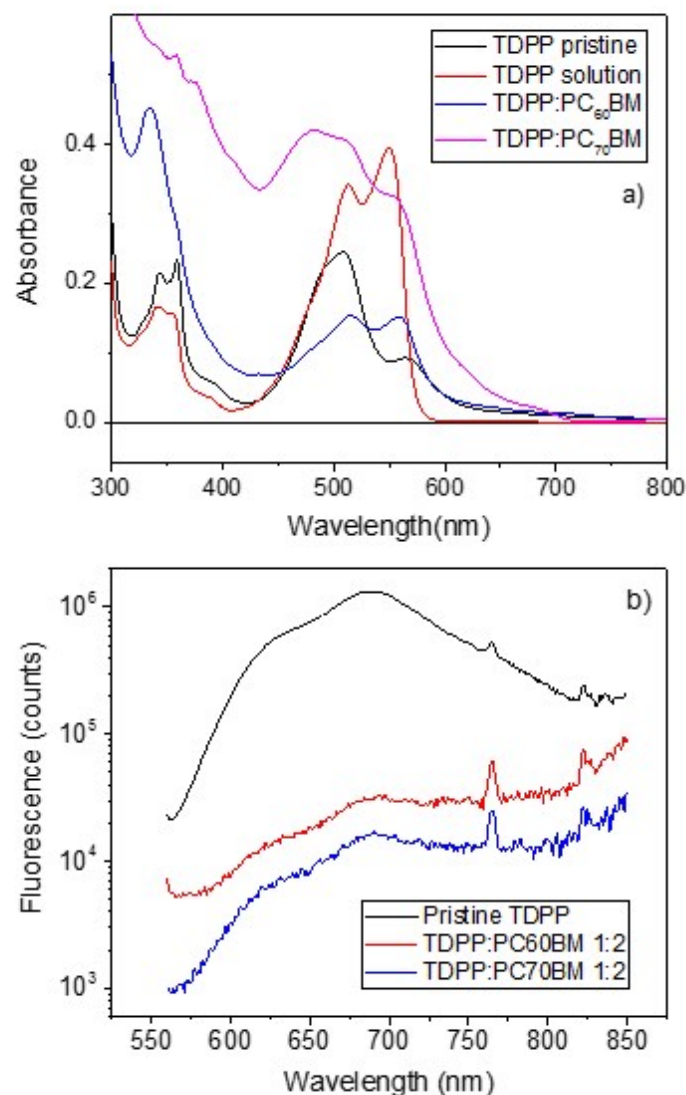

**Figure S1.** (a) The ground state absorbance spectra of the pristine TDPP film compared to solution (6 % o-dichlorobenzene, 94 % chloroform by volume), along with the two blend films of TDPP:PC<sub>60</sub>BM and TDPP:PC<sub>70</sub>BM (both 1:2 by weight). (b) The fluorescence quenching from pristine TDPP to the blend films with fullerene.

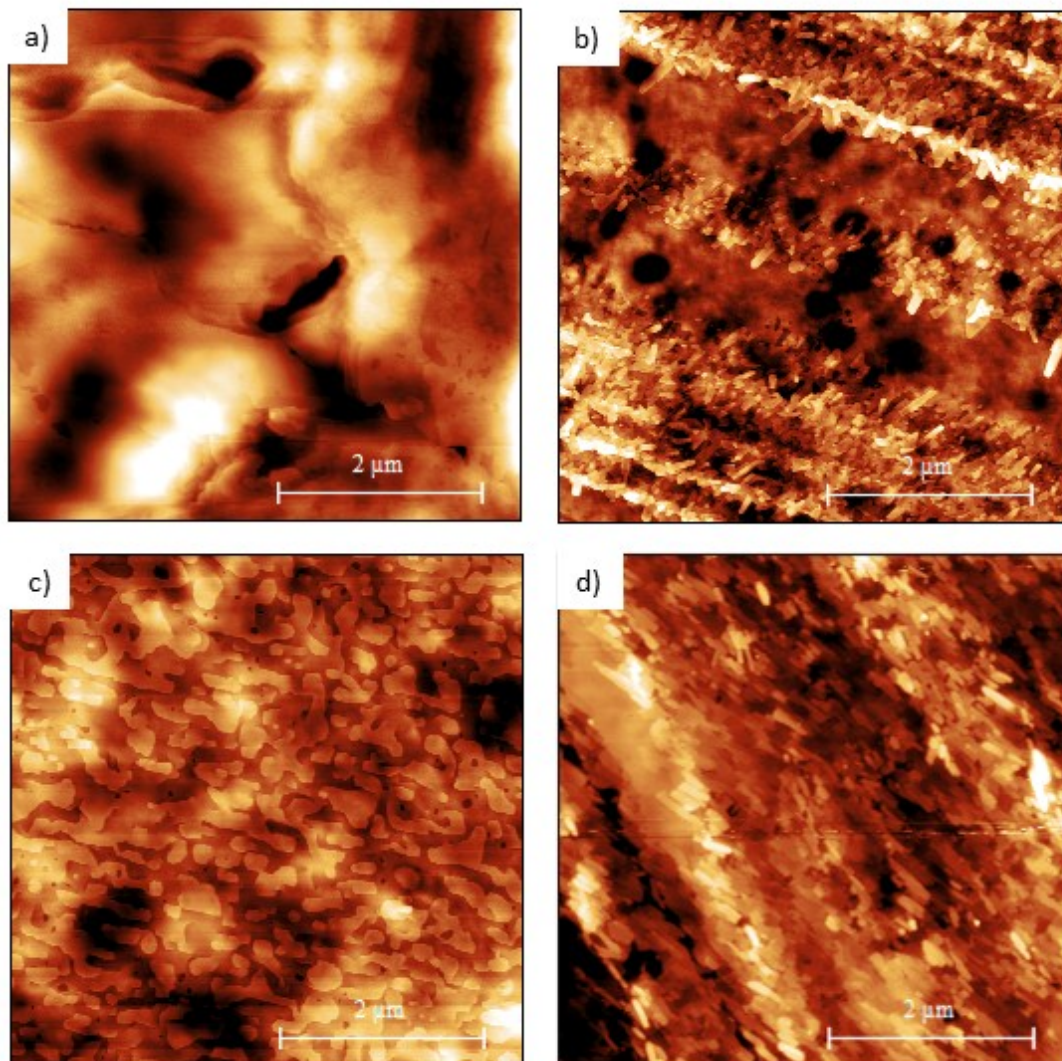

**Figure S2.** AFM images (scale bar is 2  $\mu\text{m}$ ) for (a) pristine TDPP, (b) TDPP:PC<sub>60</sub>BM (1:2), (c) TDPP:PC<sub>60</sub>BM (1.6:1), and (d) TDPP:PC<sub>70</sub>BM (1:2).

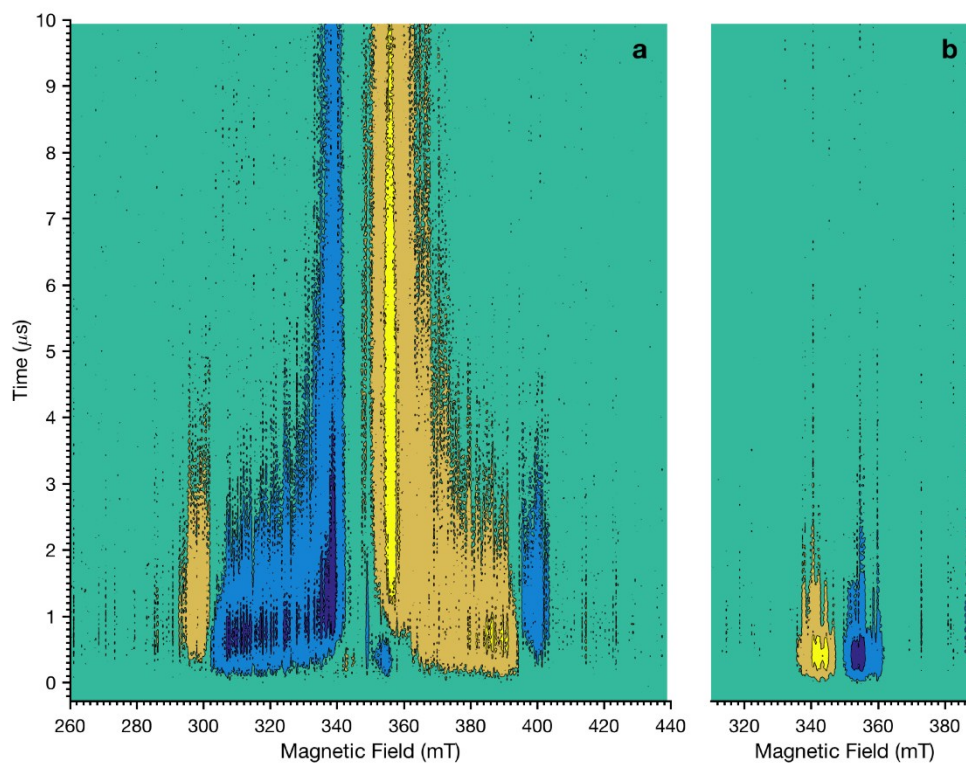

**Figure S3.** Contour representations of the 2D TR-EPR surfaces correlating the signal intensity as a function of magnetic field and time. (a) TDPP:PC<sub>70</sub>BM 1:2 blend and (b) PC<sub>70</sub>BM film. Visual comparison suffices to attribute the central feature in the TDPP:PC<sub>70</sub>BM 1:2 blend spectrum to a PC<sub>70</sub>BM triplet generated via ISC.

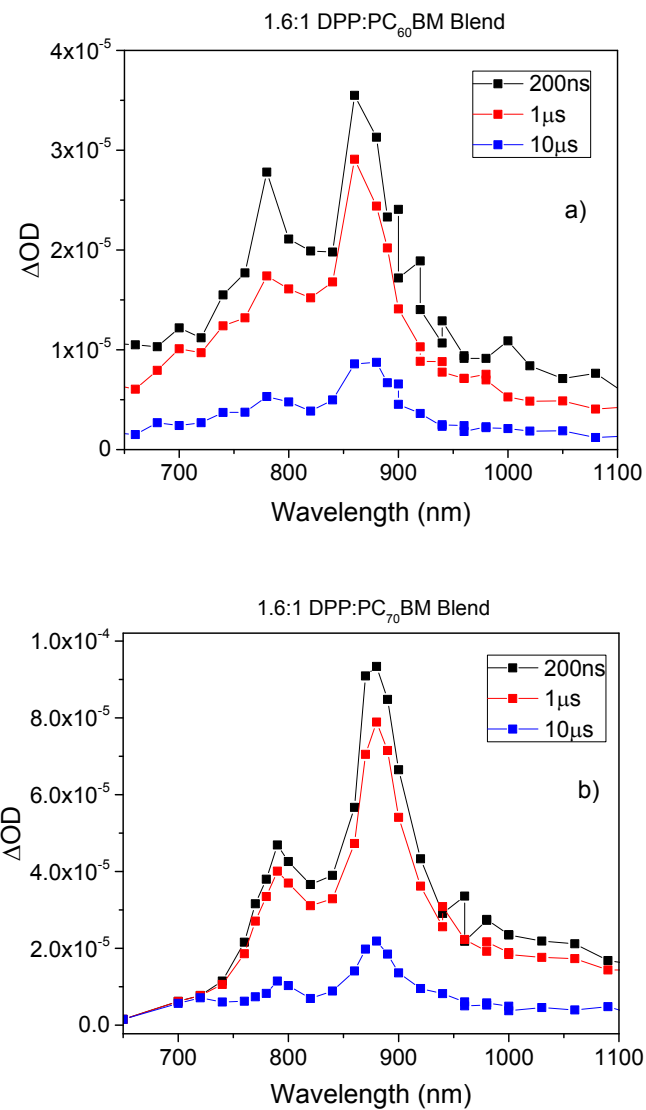

**Figure S4.** The  $\mu$ s transient absorption spectra films of (a) TDPP:PC<sub>60</sub>BM and (b) TDPP:PC<sub>70</sub>BM, both 1.6:1 by weight, using 510 nm and 130  $\mu$ J cm<sup>-2</sup> excitation.
